# Supplementary material for: Neural Signatures of Cannabis Use: Reversing Cognitive Aging via Whole-Brain Functional Network Connectivity
Source: Research Square preprint supplement (doi:10.21203/rs.3.rs-6977015/v1), 2025-08-01
Supplement: Supplementary file 1 [file e6b6bd47b3b1025b64adc223.docx]

Supplementary Materials for

“Neural Signatures of Cannabis Use: Reversing Cognitive Aging via Whole-Brain Functional Network Connectivity”

# Image Acquisition

The resting-state functional MRI (rsfMRI) data from the UK Biobank (UKB) were acquired using a Siemens Skyra 3T MRI system (software version VD13A SP4) equipped with a standard 32-channel Siemens RF receive head coil. Echo-planar imaging (EPI) acquisitions employed simultaneous multi-slice (multiband) acceleration. The UKB scanning protocol incorporates pulse sequences and image reconstruction algorithms developed by the Center for Magnetic Resonance Research (CMRR) at the University of Minnesota, which were partially developed as part of the Human Connectome Project (HCP).

To correct for susceptibility-induced distortions in the EPI data, a static magnetic field (B₀) map is estimated using a pair of spin-echo EPI images acquired with reversed phase-encoding directions. This estimated field map is subsequently applied to correct geometric distortions in the rsfMRI datasets.

The rsfMRI scans were acquired with the following imaging parameters: repetition time (TR) = 735 ms, echo time (TE) = 39 ms, flip angle (FA) = 52°, isotropic voxel size = 2.4 × 2.4 × 2.4 mm³, field of view (FOV) = 88 × 88 × 64 matrix, and a total acquisition time of 6 minutes, yielding 490 timepoints. In addition, a single-band reference scan—acquired with the same spatial geometry and EPI distortion profile as the multiband timeseries data—was collected. This scan, characterized by higher tissue contrast-to-noise ratio, is used as the reference image for head motion correction.

# Minimal Preprocessed Data and Normalization

We utilized minimally preprocessed rsfMRI data from the UKB database. The preprocessing procedures are detailed in the UKB notebook, section 3.1 (https://biobank.ctsu.ox.ac.uk/crystal/crystal/docs/brain_mri.pdf). The minimal preprocessing pipeline implemented by UKB includes several standardized steps designed to ensure data quality and consistency across subjects. Preprocessing steps include motion correction using MCFLIRT1, followed by grand-mean intensity normalization of the entire 4D dataset via a single multiplicative scaling factor. Temporal high-pass filtering is applied using Gaussian-weighted least-squares straight line fitting (σ = 50 s) to remove low-frequency drifts. Geometric distortions inherent to EPI are corrected using fieldmap-based EPI unwarping and gradient distortion correction (GDC) procedures. Subsequently, structured noise and artifacts are identified and removed using ICA+FIX denoising. This approach applies Independent Component Analysis (ICA) followed by FMRIB's ICA-based X-noiseifier (FIX)2–4. The FIX classifier was hand-trained on 40 UKB rfMRI datasets and validated using a leave-one-out approach, achieving classification accuracies of 99.1%/100.0% for non-artifactual components and 98.1%/98.3% for artifactual components. The final preprocessed and denoised rsfMRI time series data are stored in the file filtered_func_data_clean.

We applied additional spatial normalization procedures to transform the minimally preprocessed rsfMRI data into the NeuroMark template space. Initially, the data were linearly registered to the standard Montreal Neurological Institute (MNI) space using the FMRIB’s Linear Image Registration Tool (FLIRT) within the FSL software suite, employing an echo-planar imaging (EPI) template to improve alignment accuracy for functional data. During this process, the data were resampled to an isotropic voxel resolution of 3 × 3 × 3 mm³ to ensure compatibility with downstream analyses. Following spatial normalization, the rsfMRI volumes were smoothed using a Gaussian kernel with a full width at half maximum (FWHM) of 6 mm to enhance the signal-to-noise ratio and accommodate inter-subject anatomical variability.

# Quality Control for the rsfMRI data

Ensuring high temporal and spatial quality preprocessed rsfMRI data is critical for independent component analysis (ICA) and subsequent functional network connectivity (FNC) estimation. To this end, we implemented the NeuroMark quality control (QC) procedure to identify and retain high-quality rsfMRI datasets for further analysis. The NeuroMark QC has been extensively validated and widely applied in previous studies, demonstrating its effectiveness in selecting data for producing robust and reproducible neuroimaging biomarkers5–11.

We first assessed head motion using the estimated rigid-body motion parameters obtained during the motion correction step. Scans were excluded if they exhibited excessive motion, defined as any rotational displacement exceeding 3 degrees or translational displacement larger than 3 mm in any direction at any time point. In addition, we computed framewise displacement (FD) as described by Power et al.12 to quantify volume-to-volume head motion. Scans with a mean FD exceeding 0.35 mm were excluded from further analysis. This temporal QC ensures that retained datasets exhibit minimal motion-related artifacts, thereby improving the reliability and accuracy of imaging feature extraction.

For spatial QC, we employed an approach based on brain coverage and mask consistency. First, an individual brain mask was generated for each scan using the first volume of the rsfMRI time series. Voxels with intensity values exceeding 90% of the whole-brain mean signal were assigned a value of 1 to define the individual mask. A group-level mask was then constructed by including only those voxels present in more than 90% of individual masks across all scans. We computed the spatial correlation between each mask (from each scan) and the group mask. These correlations were calculated separately for three regions: the superior portion (top 10 axial slices), the inferior portion (bottom 10 axial slices), and the entire brain mask. For each scan, three correlation coefficients were obtained. A scan was considered to meet the spatial QC criteria if it exhibited a spatial correlation greater than 0.75 in the top 10 slices, greater than 0.55 in the bottom 10 slices, and greater than 0.80 across the whole brain. Scans satisfying all three thresholds were deemed to have adequate brain coverage and spatial alignment and were retained for subsequent analysis.

# NeuroMark Framework and Functional Network Connectivity

We applied a hybrid data-driven framework, NeuroMark13,14, to the rsfMRI data to extract subject-specific intrinsic connectivity networks (ICNs) for subsequent functional network connectivity (FNC) analysis. The NeuroMark framework integrates the strengths of both atlas-based and data-driven approaches by combining a robust, pre-defined spatial network template with spatially constrained independent component analysis (ICA). This template-guided ICA approach addresses key limitations of traditional atlas-based methods—such as limited flexibility and reliance on arbitrary parcellations—and of fully data-driven decomposition methods, which often yield components that are not directly comparable across individuals or studies. By enforcing spatial constraints derived from a standardized template, NeuroMark ensures the extraction of ICNs that are spatially consistent and directly comparable across subjects and datasets. It enhances the reproducibility and generalizability of network-level findings while still retaining sensitivity to individual variability in functional organization. The NeuroMark framework offers a principled and reproducible approach to identifying intrinsic brain networks, thereby enabling robust cross-subject and cross-cohort analyses of large-scale functional connectivity patterns.

In this study, we employed the NeuroMark 1.0 functional template as a reference framework. This template comprises 53 robust and reproducible ICNs, characterized by peak activations predominantly located in meaningful gray matter regions and associated with low-frequency fluctuations in their corresponding time courses (TCs). The 53 ICNs are categorized into seven functional domains—sensorimotor, visual, cognitive control, default mode, auditory, subcortical, and cerebellar—based on prior anatomical and functional knowledge. The spatial maps of these ICNs are shown in Figure S1, and their detailed labels and domain assignments are provided in Table S1. For each scan, NeuroMark estimated ICN spatial maps and associated TCs using group-information-guided independent component analysis (GIG-ICA)15, a back-reconstruction approach that consists of two objective functions, one to optimize the independence of single-subject ICNs and the other to optimize the correspondence between single-subject ICNs and the template prior. Compared to conventional ICA back-reconstruction techniques, GIG-ICA has demonstrated improved estimation accuracy and higher intra-class correlation coefficients (ICCs) for single-subject ICNs16,17. Additionally, GIG-ICA is more sensitive to inter-individual variations in functional network features, making it particularly beneficial for distinguishing clinical populations from healthy controls18. The NeuroMark framework, in conjunction with the 1.0 functional template, has been widely adopted in the neuroimaging community and has proven effective in identifying robust and reproducible functional biomarkers across a broad range of studies and clinical populations6,10,27,19–26.

To further reduce residual noise, we applied a post-processing pipeline to the TCs of the ICNs. This pipeline consisted of the following steps: (1) detrending to remove linear, quadratic, and cubic trends; (2) multiple linear regression to eliminate the effects of six motion realignment parameters and their first-order temporal derivatives; (3) removal of outlier volumes identified as temporal artifacts; and (4) temporal band-pass filtering within the frequency range of 0.01–0.15 Hz to retain physiologically relevant low-frequency fluctuations. Following denoising, FNC was computed by calculating Pearson correlation coefficients between the TCs of all ICN pairs. This resulted in a 53 × 53 symmetric FNC matrix for each subject, representing whole-brain functional connectivity patterns among the 53 networks.

Labels and Peak Coordinates of 53 Intrinsic Connectivity Networks (ICNs)

| **ICNs** | **X** | **Y** | **Z** |
| --- | --- | --- | --- |
| **Sub-cortical domain (SC): 5 ICNs** | | | |
| Caudate (1) | 6.5 | 10.5 | 5.5 |
| Subthalamus/hypothalamus (2) | -2.5 | -13.5 | -1.5 |
| Putamen (3) | -26.5 | 1.5 | -0.5 |
| Caudate (4) | 21.5 | 10.5 | -3.5 |
| Thalamus (5) | -12.5 | -18.5 | 11.5 |
| **Auditory domain (AUD): 2 ICNs** | | | |
| Superior temporal gyrus ([STG], 6) | 62.5 | -22.5 | 7.5 |
| Middle temporal gyrus ([MTG], 7) | -42.5 | -6.5 | 10.5 |
| **Sensorimotor domain (SM): 9 ICNs** | | | |
| Postcentral gyrus ([PoCG], 8) | 56.5 | -4.5 | 28.5 |
| Left postcentral gyrus ([L PoCG], 9) | -38.5 | -22.5 | 56.5 |
| Paracentral lobule ([ParaCL], 10) | 0.5 | -22.5 | 65.5 |
| Right postcentral gyrus ([R PoCG], 11) | 38.5 | -19.5 | 55.5 |
| Superior parietal lobule ([SPL], 12) | -18.5 | -43.5 | 65.5 |
| Paracentral lobule ([ParaCL], 13) | -18.5 | -9.5 | 56.5 |
| Precentral gyrus ([PreCG], 14) | -42.5 | -7.5 | 46.5 |
| Superior parietal lobule ([SPL], 15) | 20.5 | -63.5 | 58.5 |
| Postcentral gyrus ([PoCG], 16) | -47.5 | -27.5 | 43.5 |
| **Visual domain (VS): 9 ICNs** | | | |
| Calcarine gyrus ([CalcarineG], 17) | -12.5 | -66.5 | 8.5 |
| Middle occipital gyrus ([MOG], 18) | -23.5 | -93.5 | -0.5 |
| Middle temporal gyrus ([MTG], 19) | 48.5 | -60.5 | 10.5 |
| Cuneus (20) | 15.5 | -91.5 | 22.5 |
| Right middle occipital gyrus ([R MOG], 21) | 38.5 | -73.5 | 6.5 |
| Fusiform gyrus (22) | 29.5 | -42.5 | -12.5 |
| Inferior occipital gyrus ([IOG], 23) | -36.5 | -76.5 | -4.5 |
| Lingual gyrus ([LingualG], 24) | -8.5 | -81.5 | -4.5 |
| Middle temporal gyrus ([MTG], 25) | -44.5 | -57.5 | -7.5 |
| **Cognitive-control domain (CC): 17 ICNs** | | | |
| Inferior parietal lobule ([IPL], 26) | 45.5 | -61.5 | 43.5 |
| Insula (27) | -30.5 | 22.5 | -3.5 |
| Superior medial frontal gyrus ([SMFG], 28) | -0.5 | 50.5 | 29.5 |
| Inferior frontal gyrus ([IFG], 29) | -48.5 | 34.5 | -0.5 |
| Right inferior frontal gyrus ([R IFG], 30) | 53.5 | 22.5 | 13.5 |
| Middle frontal gyrus ([MiFG], 31) | -41.5 | 19.5 | 26.5 |
| Inferior parietal lobule ([IPL], 32) | -53.5 | -49.5 | 43.5 |
| Left inferior parietal lobue ([R IPL], 33) | 44.5 | -34.5 | 46.5 |
| Supplementary motor area ([SMA], 34) | -6.5 | 13.5 | 64.5 |
| Superior frontal gyrus ([SFG], 35) | -24.5 | 26.5 | 49.5 |
| Middle frontal gyrus ([MiFG], 36) | 30.5 | 41.5 | 28.5 |
| Hippocampus ([HiPP], 37) | 23.5 | -9.5 | -16.5 |
| Left inferior parietal lobue ([L IPL], 38) | 47.5 | 5.5 | 22.5 |
| Middle cingulate cortex ([MCC], 39) | -15.5 | 20.5 | 37.5 |
| Inferior frontal gyrus ([IFG], 40) | 39.5 | 44.5 | -0.5 |
| Middle frontal gyrus ([MiFG], 41) | -26.5 | 47.5 | 5.5 |
| Hippocampus ([HiPP], 42) | -24.5 | -36.5 | 1.5 |
| **Default-mode domain (DM): 7 ICNs** | | | |
| Precuneus (43) | -8.5 | -66.5 | 35.5 |
| Precuneus (44) | -12.5 | -54.5 | 14.5 |
| Anterior cingulate cortex ([ACC], 45) | -2.5 | 35.5 | 2.5 |
| Posterior cingulate cortex ([PCC], 46) | -5.5 | -28.5 | 26.5 |
| Anterior cingulate cortex ([ACC], 47) | -9.5 | 46.5 | -10.5 |
| Precuneus (48) | -0.5 | -48.5 | 49.5 |
| Posterior cingulate cortex ([PCC], 49) | -2.5 | 54.5 | 31.5 |
| **Cerebellar domain (CB): 4 ICNs** | | | |
| Cerebellum ([CB], 50) | -30.5 | -54.5 | -42.5 |
| Cerebellum ([CB], 51) | -32.5 | -79.5 | -37.5 |
| Cerebellum ([CB], 52) | 20.5 | -48.5 | -40.5 |
| Cerebellum ([CB], 53) | 30.5 | -63.5 | -40.5 |


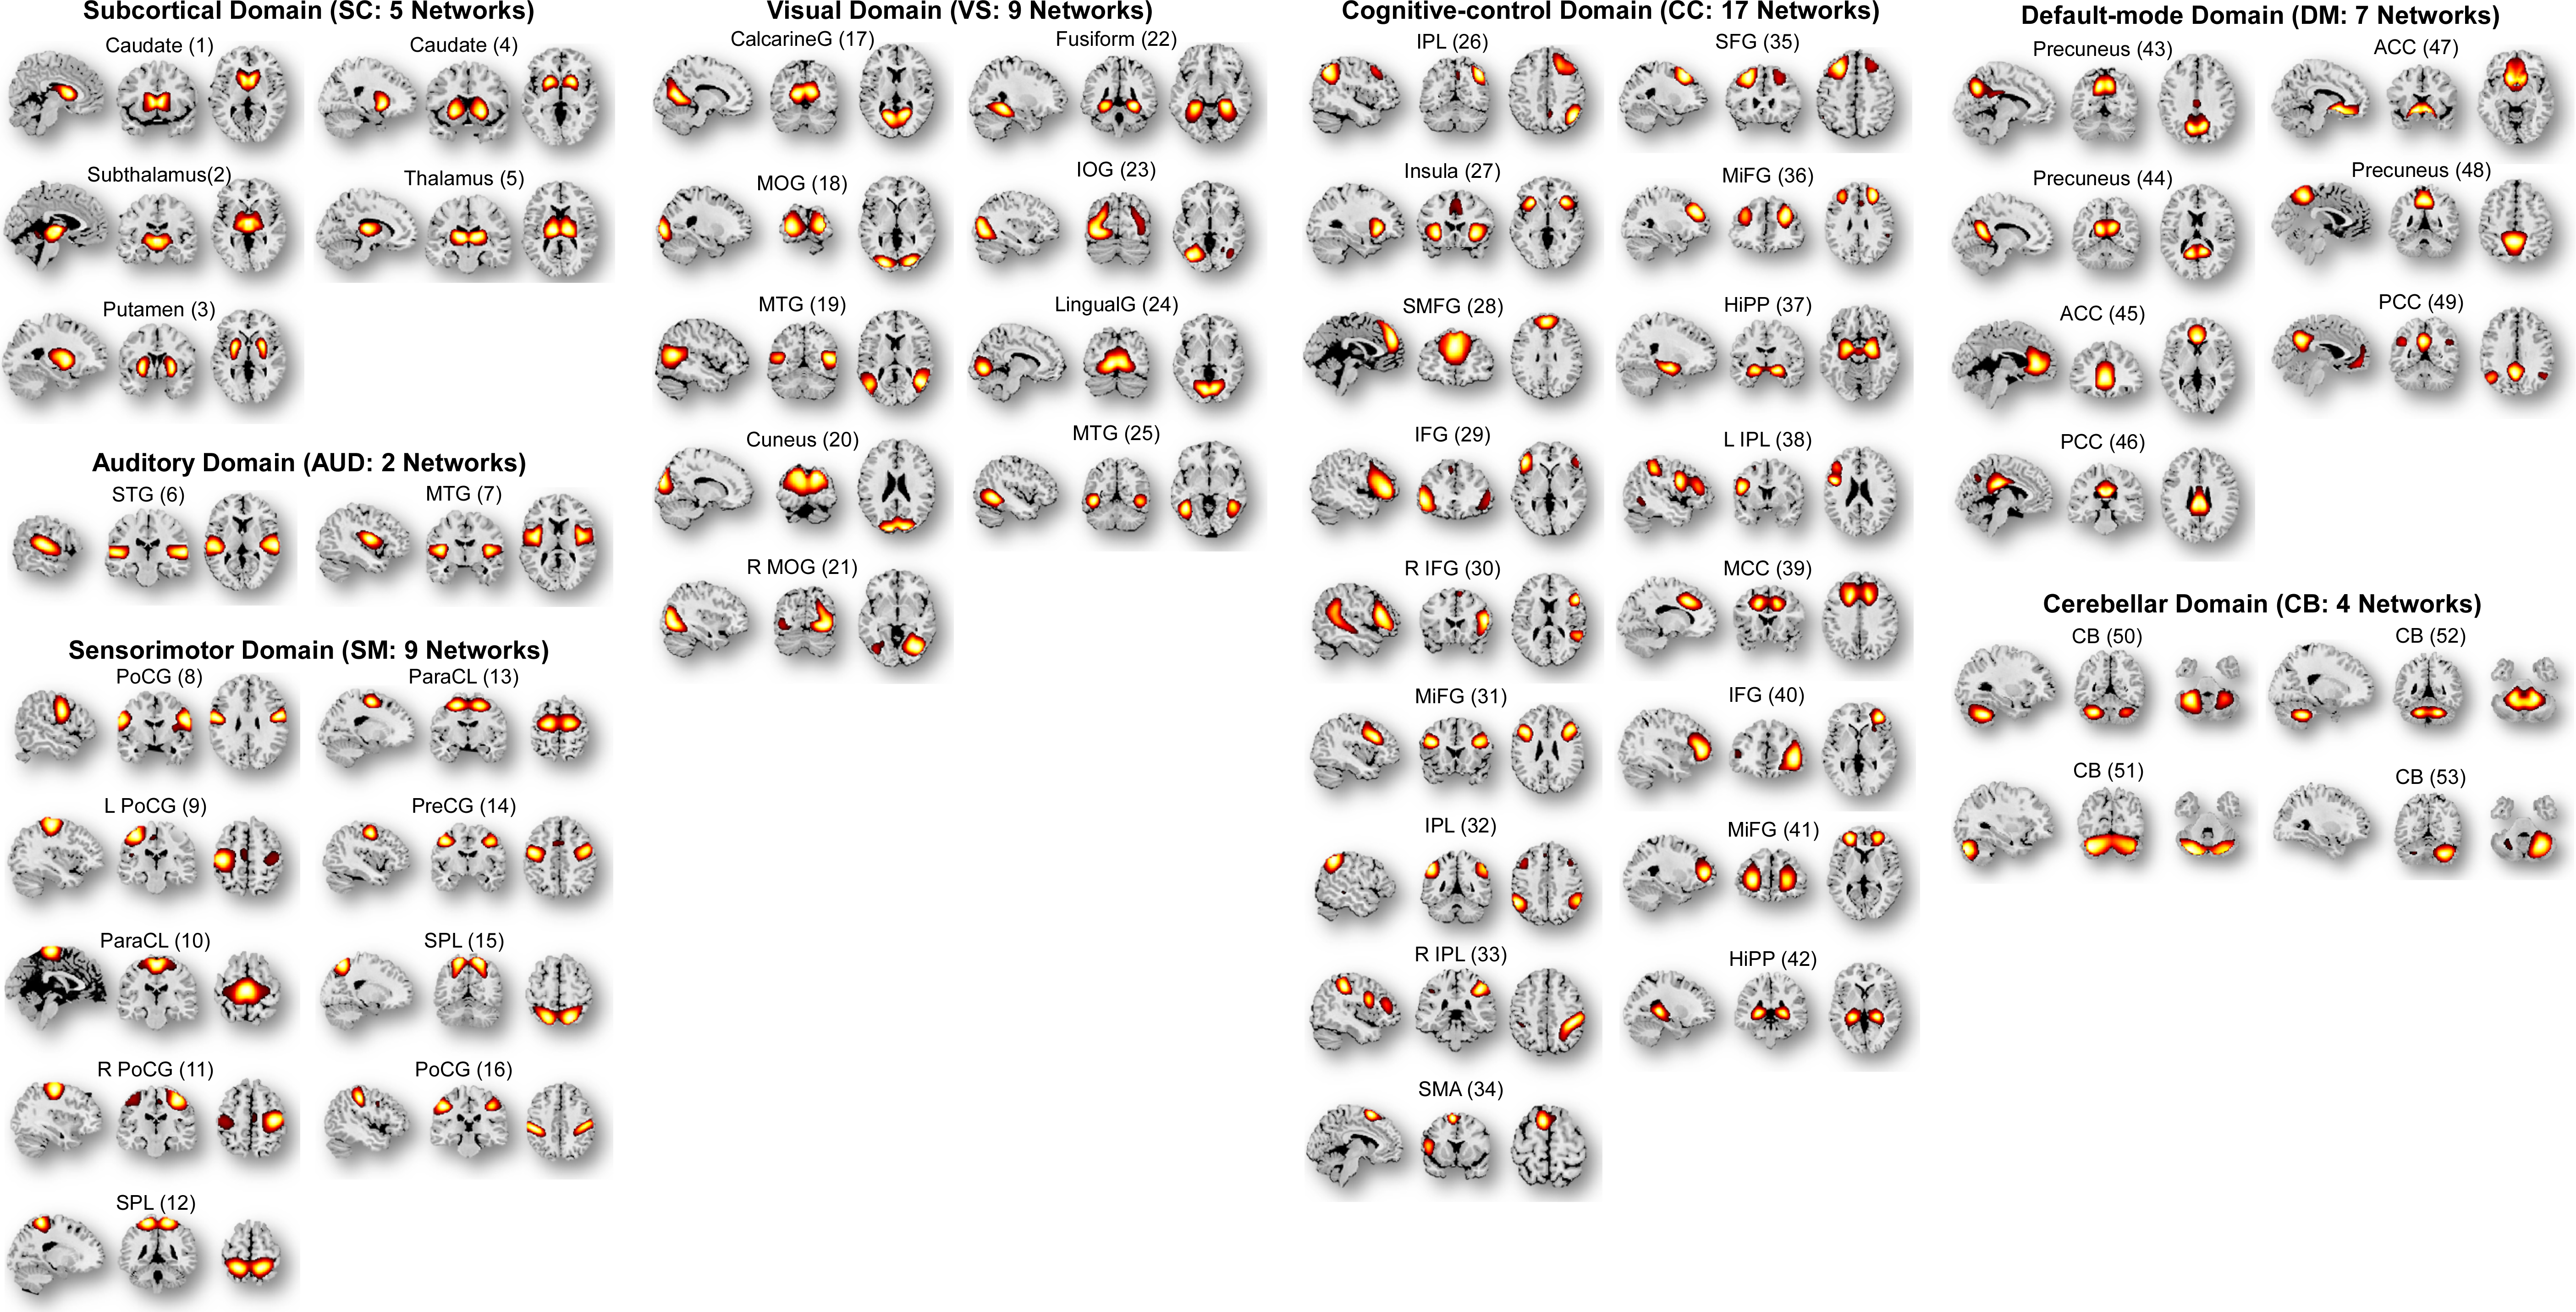


**Spatial maps of ICNs from the NeuroMark 1.0 functional template.** ICNs are assigned into seven functional domains and are thresholded at |*t*|>10, where one-sample t-statistics have been computed across the single-subject spatial maps. Sagittal, coronal, and axial slices are shown at the maximal t-statistic for clusters larger than 3 cm3.

# UK Biobank Cognitive Assessments

The UKB cognitive assessment battery comprises a range of tasks designed to evaluate cognitive functioning across multiple domains, including executive function, memory, reasoning, and vocabulary—domains that may be relevant to cannabis use and its potential neurocognitive correlates28. For the present study, we focused on nine cognitive tasks with sufficient coverage and relevance to our research objectives: (1) reaction time test, (2) fluid intelligence test, (3) numeric memory test, (4) trail-making test, (5) symbol digit substitution test, (6) picture vocabulary test, (7) paired associate learning test, (8) tower rearranging test, and (9) matrix pattern completion test. We excluded the pair matching and prospective memory tasks from our analyses due to an insufficient number of valid observations in these tests for the target population, limiting their utility for the current investigation.

The reaction time test implemented a Go/No-Go paradigm to assess participants' processing speed and motor response latency. During the task, participants were presented with two cards, each displaying a symbol. The symbols were either identical (match condition) or different (non-match condition). Participants were instructed to respond as quickly as possible by pressing a button on a desk-mounted response box only when the symbols matched. For this study, we focused on the metric "Duration to first press of snap-button in each round" (Data Field 404), which quantifies the reaction time in milliseconds. Shorter response times were interpreted as indicative of better cognitive performance in this domain.

The fluid intelligence test evaluated participants' verbal and numerical reasoning abilities through a series of 13 multiple-choice questions. For each item, participants selected the response they believed to be correct or, alternatively, could choose “Do not know” or “Prefer not to answer.” In this study, we utilized the total fluid intelligence score (Data Field 20016), defined as the number of correct responses provided within a two-minute time limit. This score served as a quantitative measure of fluid reasoning ability, with higher scores indicating better cognitive performance in this domain.

The numeric memory test is a computerized backward digit span task designed to assess working memory capacity. Participants were briefly presented with a two-digit number on the screen. Following a short delay, they were instructed to recall and enter the digits in reverse order using an on-screen keypad. With each correct response, the length of the digit sequence increased by one, progressively challenging the participant's working memory. For this study, we focused on the maximum number of digits recalled correctly (Data-Field 4282). This measure reflects the participant's peak working memory span, with higher values indicating better memory performance.

The trail-making test used in this study is a computerized adaptation of the Halstead-Reitan Trail Making Test, a widely used measure of executive function, particularly cognitive flexibility, visual attention, and task switching. The test comprises two parts: Trail A (numeric sequencing) and Trail B (alphanumeric switching). Each part is preceded by a brief practice trial to ensure participant understanding. Participants were instructed to sequentially select numbers (Trail A) or alternate between numbers and letters (Trail B) as quickly and accurately as possible by interacting with on-screen elements. For this study, we examined the average number of errors of "Total errors traversing numeric path (Trail #1)" (Data-Field 6349) and "Total errors traversing alphanumeric path (Trail #2)" (Data-Field 6351). Fewer errors on these measures were interpreted as indicative of better executive functioning.

The symbol digit substitution test measures cognitive processing speed and associative learning. In this test, participants are shown a reference key with pairs of symbols and their corresponding numbers (symbols on the top row and numbers on the bottom row). Below the key, a sequence of symbols appears, and participants must enter the number associated with each symbol using an on-screen keypad. For this study, we assessed performance by calculating the ratio of correctly matched symbol–digit pairs (Data Field 23324) to the total number of attempted matches (Data Field 23323). This accuracy ratio serves as an index of processing efficiency, with values close to 1 indicating higher performance.

The picture vocabulary test assesses receptive vocabulary and language comprehension. It is an adapted version of the NIH Toolbox Picture Vocabulary Test29, tailored for use in the UK Biobank cohort. During the task, participants were presented with four images on the screen alongside a written target word. They were instructed to select the image that best corresponded to the meaning of the word. In the present study, we analyzed performance using the vocabulary ability score (Data Field 26302). This score serves as an index of verbal comprehension, with higher values reflecting superior vocabulary knowledge.

The paired associate learning test is a measure of verbal declarative memory, specifically assessing the ability to form and retrieve associations between word pairs. During the task, participants were shown 12 word pairs on a screen for a fixed duration of 30 seconds. Following this encoding phase, they were presented with one word from each pair (the cue or target word) and asked to identify its corresponding associate from a set of four response options. In this study, we utilized the number of correctly identified word pairs (Data Field 20197) as the primary performance metric. Higher scores on this measure reflect stronger verbal associative memory performance.

The tower rearranging test assesses planning ability, a key component of executive functioning. This task is an adapted version of the one-touch Tower of London test30, a well-established neuropsychological measure of goal-directed problem-solving. In each trial, participants are shown two visual configurations—Display A (the initial state) and Display B (the goal state)—and are instructed to determine the minimum number of moves required to transform Display A into Display B. In this study, task performance is quantified using the ratio of correctly solved puzzles (Data Field 21004) to the total number of puzzles attempted (Data Field 6383). This accuracy ratio serves as an index of planning efficiency, with values approaching 1 indicating superior performance.

The matrix pattern completion test evaluates non-verbal fluid reasoning, assessing abstract problem-solving and pattern recognition abilities. This task is an adapted version of the COGNITO Matrices test31, a validated instrument commonly used in cognitive assessments. Participants were required to infer the underlying logical rules governing a series of visual patterns and to identify the correct missing element from a set of 6 to 8 response options. In this study, we focused on the ratio of correctly completed puzzles (Data Field 6373) to the total number of puzzles viewed (Data Field 6374). This accuracy-based metric reflects the participant’s fluid reasoning ability, with values approaching 1 indicating higher cognitive performance.

# References

1. Jenkinson, M., Bannister, P., Brady, M. & Smith, S. Improved optimization for the robust and accurate linear registration and motion correction of brain images. *Neuroimage* **17**, 825–841 (2002).

2. Beckmann, C. F. & Smith, S. M. Probabilistic Independent Component Analysis for Functional Magnetic Resonance Imaging. *IEEE Trans. Med. Imaging* **23**, 137–152 (2004).

3. Griffanti, L. *et al.* Hand classification of fMRI ICA noise components. *Neuroimage* **154**, 188–205 (2017).

4. Salimi-Khorshidi, G. *et al.* Automatic denoising of functional MRI data: Combining independent component analysis and hierarchical fusion of classifiers. *Neuroimage* **90**, 449–468 (2014).

5. Fu, Z. *et al.* Whole-Brain Functional Connectivity Dynamics Associated With Electroconvulsive Therapy Treatment Response. *Biol. Psychiatry Cogn. Neurosci. Neuroimaging* **7**, 312–322 (2022).

6. Du, Y. *et al.* Evidence of shared and distinct functional and structural brain signatures in schizophrenia and autism spectrum disorder. *Commun. Biol.* **4**, 1–16 (2021).

7. Li, K. *et al.* The Influence of Cerebral Small Vessel Disease on Static and Dynamic Functional Network Connectivity in Subjects along Alzheimer’s Disease Continuum. *Brain Connect.* **11**, 189–200 (2021).

8. Fu, Z. *et al.* Dynamic functional network reconfiguration underlying the pathophysiology of schizophrenia and autism spectrum disorder. *Hum. Brain Mapp.* hbm.25205 (2020). doi:10.1002/hbm.25205

9. Fu, Z. *et al.* Cerebro-cerebellar functional neuroplasticity mediates the effect of electric field on electroconvulsive therapy outcomes. *Transl. Psychiatry* **13**, (2023).

10. Fu, Z., Liu, J., Salman, M. S., Sui, J. & Calhoun, V. D. Functional connectivity uniqueness and variability? Linkages with cognitive and psychiatric problems in children. *Nat. Ment. Heal.* **1**, 956–970 (2023).

11. Fu, Z., Sui, J., Iraji, A., Liu, J. & Calhoun, V. D. Cognitive and psychiatric relevance of dynamic functional connectivity states in a large (N > 10,000) children population. *Mol. Psychiatry* **30**, 402–413 (2024).

12. Power, J. D., Barnes, K. A., Snyder, A. Z., Schlaggar, B. L. & Petersen, S. E. Spurious but systematic correlations in functional connectivity MRI networks arise from subject motion. *Neuroimage* **59**, 2142–2154 (2012).

13. Fu, Z. *et al.* Searching Reproducible Brain Features using NeuroMark: Templates for Different Age Populations and Imaging Modalities. *Neuroimage* **292**, 120617 (2024).

14. Du, Y. *et al.* NeuroMark: An automated and adaptive ICA based pipeline to identify reproducible fMRI markers of brain disorders. *NeuroImage Clin.* **28**, (2020).

15. Du, Y. & Fan, Y. Group information guided ICA for fMRI data analysis. *Neuroimage* **69**, 157–197 (2013).

16. Du, Y. *et al.* Comparison of IVA and GIG-ICA in brain functional network estimation using fMRI data. *Front. Neurosci.* **11**, (2017).

17. Du, Y. *et al.* Artifact removal in the context of group ICA: A comparison of single-subject and group approaches. *Hum. Brain Mapp.* **37**, 1005–1025 (2016).

18. Salman, M. S. *et al.* Group ICA for identifying biomarkers in schizophrenia: ‘Adaptive’ networks via spatially constrained ICA show more sensitivity to group differences than spatio-temporal regression. *NeuroImage Clin.* **22**, 101747 (2019).

19. Dhamala, E., Yeo, B. T. T. & Holmes, A. J. One Size Does Not Fit All: Methodological Considerations for Brain-Based Predictive Modeling in Psychiatry. *Biol. Psychiatry* **93**, 717–728 (2023).

20. Levey, A. I. *et al.* A phase II study repurposing atomoxetine for neuroprotection in mild cognitive impairment. *Brain* **145**, 1924–1938 (2022).

21. Zhao, M. *et al.* An attention-based hybrid deep learning framework integrating brain connectivity and activity of resting-state functional MRI data. *Med. Image Anal.* **78**, (2022).

22. Fu, Z. *et al.* Dynamic functional network connectivity associated with post-traumatic stress symptoms in COVID-19 survivors. *Neurobiol. Stress* **15**, (2021).

23. Vaidya, N. *et al.* Neurocognitive Analysis of Low-level Arsenic Exposure and Executive Function Mediated by Brain Anomalies Among Children, Adolescents, and Young Adults in India. *JAMA Netw. Open* **6**, e2312810–e2312810 (2023).

24. Tu, Y. *et al.* Distinct thalamocortical network dynamics are associated with the pathophysiology of chronic low back pain. *Nat. Commun.* **11**, 1–12 (2020).

25. Fu, Z., Iraji, A., Sui, J. & Calhoun, V. D. Whole-Brain Functional Network Connectivity Abnormalities in Affective and Non-Affective Early Phase Psychosis. *Front. Neurosci.* **15**, (2021).

26. Salman, M. S. *et al.* Multi-study evaluation of neuroimaging-based prediction of medication class in mood disorders. *Psychiatry Res. - Neuroimaging* **333**, (2023).

27. Yan, W. *et al.* A brain-wide risk score for psychiatric disorder evaluated in a large adolescent population reveals increased divergence among higher-risk groups relative to controls. *Biol. Psychiatry* (2023). doi:10.1016/j.biopsych.2023.09.017

28. Fawns-Ritchie, C. & Deary, I. J. Reliability and validity of the UK Biobank cognitive tests. *PLoS One* **15**, (2020).

29. Weintraub, S. *et al.* Cognition assessment using the NIH Toolbox. *Neurology* **80**, (2013).

30. Cognitive planning in humans: New insights from the Tower of London (TOL) task. *Cogn. Psychol. Plan.* 145–162 (2021). doi:10.4324/9780203493564-22

31. de Roquefeuil Guilhem, R. K. COGNITO: Computerized Assessment of Information Processing. *J. Psychol. Psychother.* **04**, 10 (2014).
